# Supplementary material
Source: MDPI journal article supplement (https://www.mdpi.com/2073-4395/11/5/932)
Supplement: s1 [file s1 › agronomy-1209058-supplementary.pdf]

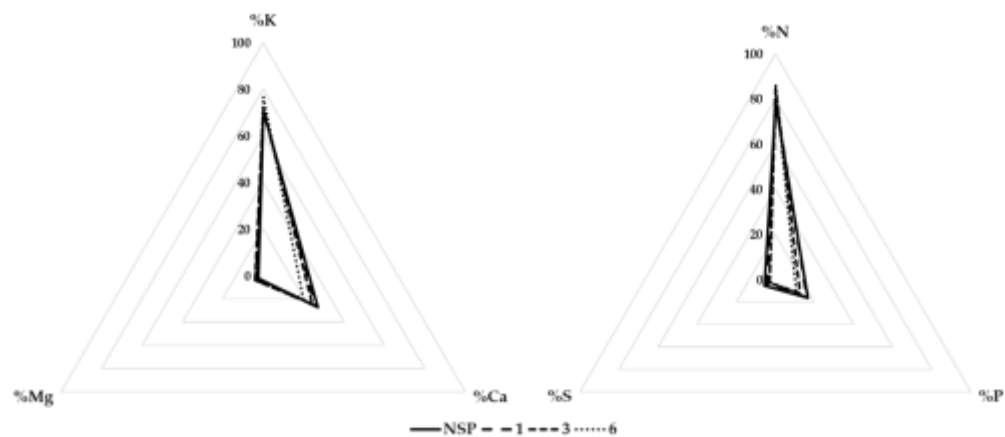

**Figure S1.** The ratio of cations (K, Mg, Ca) and anions (N, S, P) of newly-developed nutrient solution for red perilla (NSP) and of red perilla plants grown under different EC levels (1, 3, and 6 dS m<sup>-1</sup>) of NSP.
